# Supplementary material for: Mitochondrial Alterations by PARKIN in Dopaminergic Neurons Using PARK2 Patient-Specific and PARK2 Knockout Isogenic iPSC Lines
Source: PubMed Central journal article supplement (PMC4437475; doi:10.1016/j.stemcr.2015.02.019), 2015-04-02
Supplement: mmc1.pdf [file mmc1.pdf]

Stem Cell Reports, Volume 4

Supplemental Information

**Mitochondrial Alterations by PARKIN in  
Dopaminergic Neurons Using PARK2 Patient-Specific  
and *PARK2* Knockout Isogenic iPSC Lines**

Atossa Shaltouki, Renuka Sivapatham, Ying Pei, Akos A. Gerencser, Olga Momčilović,  
Mahendra S. Rao, and Xianmin Zeng

Supplemental Figure 1.

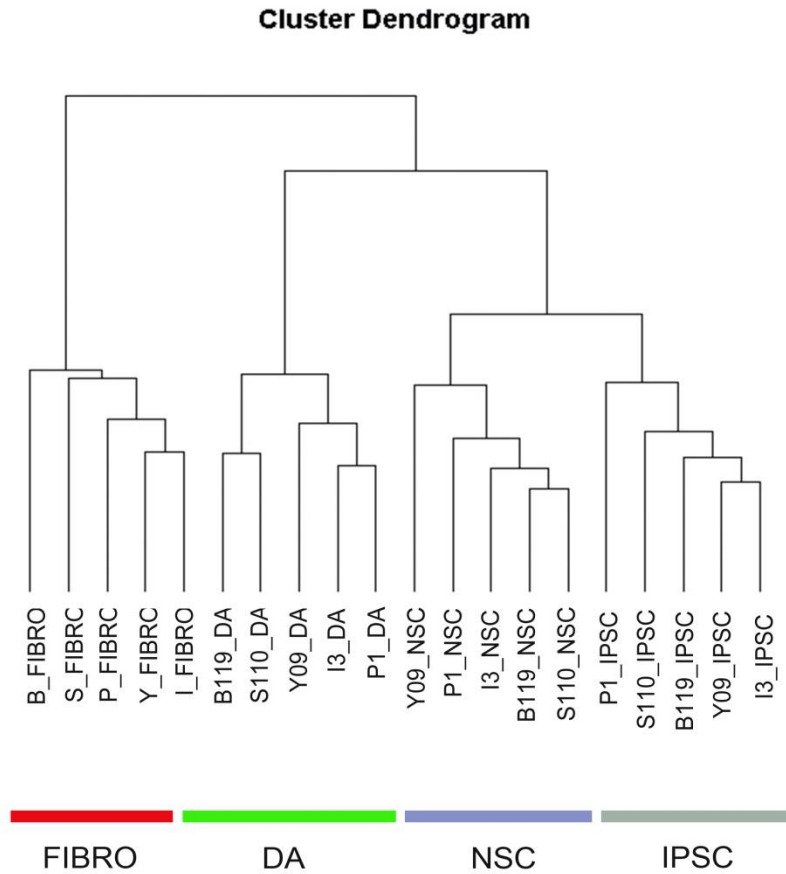

**Sup Figure 1. Whole gene expression profiles of PARK2 and control lines at various stages of dopaminergic differentiation.** The dendrogram confirms the clustering among iPSC lines, iPSC-derived NSC and iPSC-derived dopaminergic neurons. The horizontal axis of the dendrogram represents the dissimilarity between clusters in terms of gene expression pattern. The vertical axis represents clusters. Abbreviations: F: Fibroblast; iPSC: Induced pluripotent stem cells; NSC: neural stem cells; DA: dopaminergic neurons.

Supplemental Figure 2.

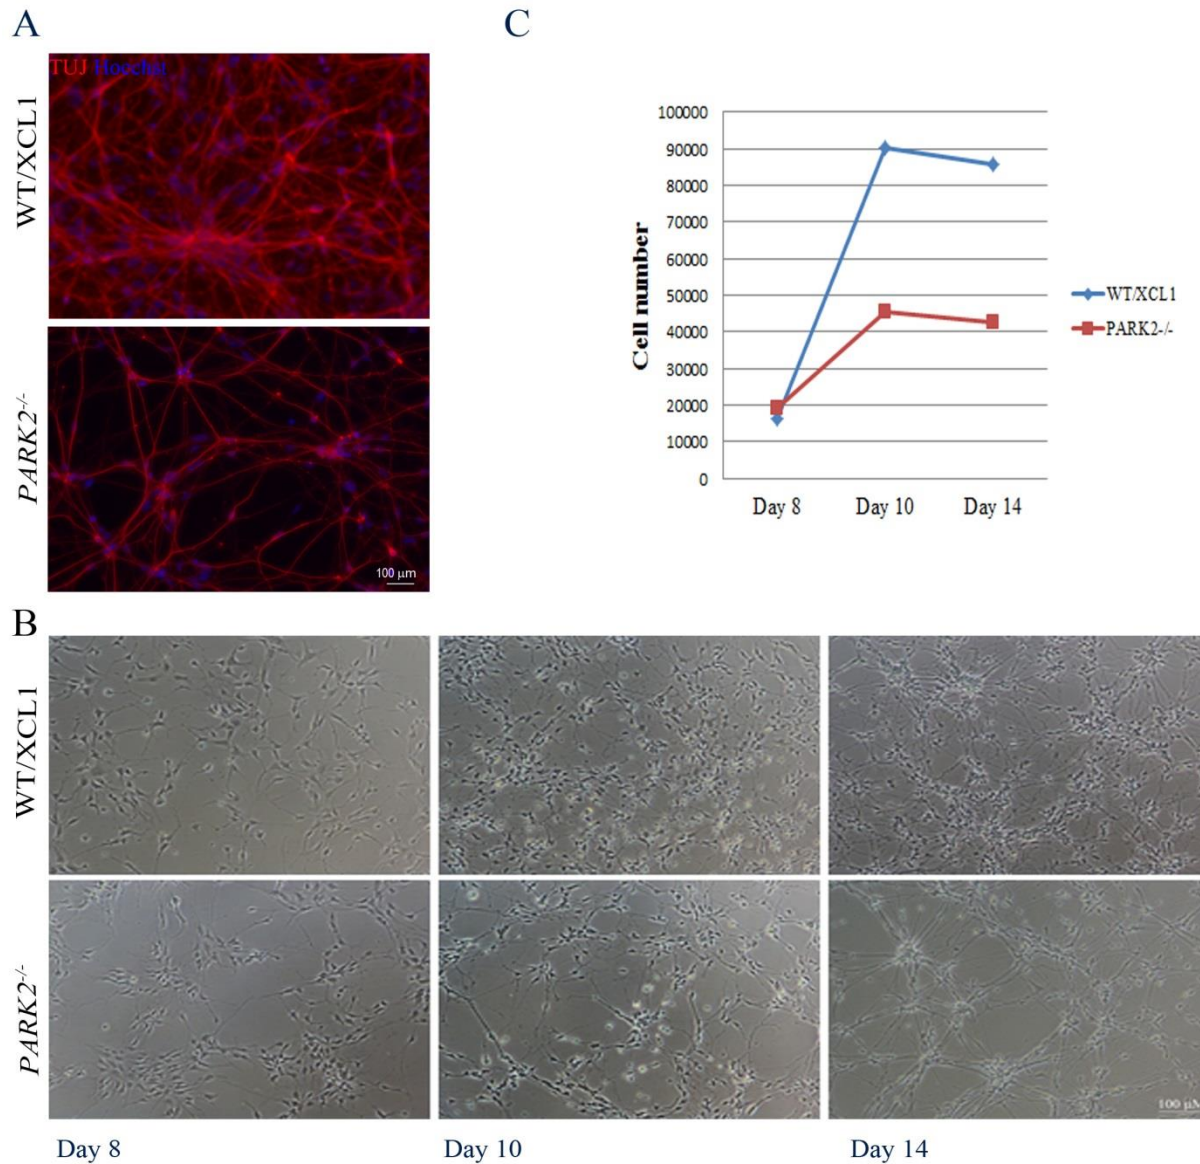

**Sup Figure 2. *PARK2*<sup>-/-</sup> neurons appeared to be more stressed compared to their isogenic control neurons.** (A) Generation of a pure population of neurons from the *PARK2* isogenic lines. More than 95% of total cells expressed TUJ-1 after 14 days of differentiation (time of assay) in both WT and *PARK2*<sup>-/-</sup> lines. (B) Morphology of neuronal cells at Day 8, 10 and 14 of Park2 KO and the control WT cells. (C) Neuronal cell count at various time points. WT cell showed a higher rate of cell proliferation when

compared to control *PARK2*<sup>-/-</sup> measured by the MTT assay. Results are representative of three independent experiments.

Supplemental Table 1. List of PARK2 patient and control cells used in the study.

| Line    | NINDS Catalog ID | Mutation                                    | Gender | Race      | Age of onset | Age of sample |
|---------|------------------|---------------------------------------------|--------|-----------|--------------|---------------|
|         | ND30171 (P)      | Park2: R42P<br>Park2: EX3DEL                | Male   | Caucasian | 42           | 54            |
| PARK2   | ND29543 (I)      | Park2: EX3-4DEL<br>Park2: 1-BP DEL,<br>255A | Male   | Hispanic  | 16           | 50            |
|         | ND29369 (B)      | Park2: R275W                                | Female | Hispanic  | 43           | 61            |
|         | ND31618 (S)      | Park2: R42P                                 | Female | Caucasian | 44           | 63            |
| Control | ND34791 (Y)      | Population control                          | Female | Caucasian | n/a          | 60            |

Supplemental Table 2. Expression of PD genes in Fibroblast and iPSC patient lines.

| <b>SYMBOL</b>         | <b>P Fibro</b> | <b>I Fibro</b> | <b>B Fibro</b> | <b>S Fibro</b> | <b>Y Fibro</b> | <b>P1 iPSC</b> | <b>I3 iPSC</b> | <b>B119 iPSC</b> | <b>S110 iPSC</b> | <b>Y9 iPSC</b> |
|-----------------------|----------------|----------------|----------------|----------------|----------------|----------------|----------------|------------------|------------------|----------------|
| <b><i>ATP13A2</i></b> | 384            | 270            | 245            | 249            | 303            | 172            | 304            | 334              | 411              | 178            |
| <b><i>ATXN2</i></b>   | 4175           | 3345           | 3041           | 3396           | 4208           | 2309           | 3897           | 3112             | 2584             | 3785           |
| <b><i>BST1</i></b>    | 691            | 884            | 169            | 323            | 281            | -2             | 25             | 30               | 5                | -5             |
| <b><i>EIF4G1</i></b>  | 2725           | 1331           | 1458           | 1188           | 2039           | 1534           | 1235           | 1389             | 1577             | 1212           |
| <b><i>FBXO7</i></b>   | 479            | 602            | 709            | 734            | 516            | 305            | 459            | 465              | 490              | 458            |
| <b><i>FGF20</i></b>   | 20             | 23             | 18             | 17             | 28             | 35             | 4              | 55               | 40               | 31             |
| <b><i>GAK</i></b>     | 867            | 472            | 571            | 493            | 576            | 506            | 502            | 401              | 391              | 630            |
| <b><i>GBA</i></b>     | 1738           | 1759           | 1465           | 2907           | 2013           | 361            | 533            | 271              | 540              | 380            |
| <b><i>GIGYF2</i></b>  | 14             | 40             | 27             | 11             | 47             | 38             | 51             | 34               | 32               | 47             |
| <b><i>GPNMB</i></b>   | 642            | 1030           | 790            | 1177           | 1312           | 80             | 6              | 71               | 20               | 33             |
| <b><i>HTRA2</i></b>   | 666            | 620            | 786            | 780            | 581            | 309            | 296            | 430              | 300              | 348            |
| <b><i>MC1R</i></b>    | 464            | 652            | 646            | 441            | 375            | 287            | 117            | 106              | 177              | 164            |
| <b><i>MCCC1</i></b>   | 689            | 753            | 641            | 828            | 618            | 1163           | 967            | 989              | 998              | 1113           |
| <b><i>PARK7</i></b>   | 15260          | 16223          | 16048          | 15681          | 15538          | 15594          | 16395          | 19195            | 16467            | 17639          |
| <b><i>PDXK</i></b>    | 2332           | 1455           | 1645           | 1621           | 1709           | 2091           | 1386           | 1662             | 1323             | 1253           |
| <b><i>PINK1</i></b>   | 1925           | 1789           | 1619           | 1967           | 1419           | 231            | 364            | 265              | 464              | 414            |
| <b><i>PM20D1</i></b>  | 42             | 66             | 43             | 74             | 51             | 64             | 55             | 32               | 10               | 28             |
| <b><i>RAB25</i></b>   | -10            | 35             | 8              | 20             | 30             | 846            | 1508           | 1722             | 1825             | 2147           |
| <b><i>SETD1A</i></b>  | 786            | 420            | 595            | 397            | 434            | 413            | 573            | 714              | 529              | 573            |
| <b><i>SNCA</i></b>    | 74             | 96             | 37             | 115            | 76             | 676            | 617            | 1099             | 872              | 1129           |
| <b><i>STK39</i></b>   | 1800           | 2220           | 2393           | 1542           | 1958           | 1455           | 1793           | 2208             | 2103             | 1750           |
| <b><i>TBP</i></b>     | 758            | 794            | 948            | 762            | 795            | 1198           | 1174           | 1413             | 1190             | 1182           |
| <b><i>UCHL1</i></b>   | 740            | 3420           | 2045           | 3740           | 3359           | 15075          | 19112          | 19483            | 17539            | 15232          |
| <b><i>VPS35</i></b>   | 3434           | 3816           | 4161           | 4053           | 3465           | 2728           | 3083           | 2005             | 2271             | 2841           |

Supplemental Table 3. R<sup>2</sup> of all patient line.

| <i>R</i> <sup>2</sup> | Y     | Y9   | Y09  | Y09  | B     | B119 | B119 | B119 | I     | I3   | I3   | I3   | P     | P1   | P1   | P1   | S     | S110 | S110 | S110 |
|-----------------------|-------|------|------|------|-------|------|------|------|-------|------|------|------|-------|------|------|------|-------|------|------|------|
|                       | FIBRO | IPSC | NSC  | DA2  | FIBRO | IPSC | NSC  | DA2  | FIBRO | IPSC | NSC  | DA2  | FIBRO | IPSC | NSC  | DA2  | FIBRO | IPSC | NSC  | DA2  |
| <i>Y FIBRO</i>        | 1     | 0.86 | 0.88 | 0.84 | 0.96  | 0.86 | 0.86 | 0.8  | 0.98  | 0.85 | 0.86 | 0.86 | 0.97  | 0.86 | 0.87 | 0.85 | 0.97  | 0.86 | 0.87 | 0.82 |
| <i>Y9 IPSC</i>        | 0.86  | 1    | 0.95 | 0.91 | 0.88  | 0.98 | 0.95 | 0.86 | 0.86  | 0.99 | 0.95 | 0.92 | 0.83  | 0.97 | 0.95 | 0.92 | 0.86  | 0.98 | 0.95 | 0.89 |
| <i>Y09 NSC</i>        | 0.88  | 0.95 | 1    | 0.94 | 0.9   | 0.95 | 0.97 | 0.89 | 0.89  | 0.94 | 0.97 | 0.94 | 0.86  | 0.93 | 0.96 | 0.94 | 0.88  | 0.94 | 0.97 | 0.92 |
| <i>Y09 DA2</i>        | 0.84  | 0.91 | 0.94 | 1    | 0.85  | 0.91 | 0.93 | 0.96 | 0.85  | 0.9  | 0.94 | 0.98 | 0.8   | 0.89 | 0.93 | 0.97 | 0.84  | 0.9  | 0.93 | 0.97 |
| <i>B FIBRO</i>        | 0.96  | 0.88 | 0.9  | 0.85 | 1     | 0.88 | 0.89 | 0.82 | 0.97  | 0.87 | 0.89 | 0.87 | 0.96  | 0.86 | 0.89 | 0.86 | 0.96  | 0.88 | 0.89 | 0.84 |
| <i>B119 IPSC</i>      | 0.86  | 0.98 | 0.95 | 0.91 | 0.88  | 1    | 0.96 | 0.86 | 0.87  | 0.98 | 0.96 | 0.92 | 0.83  | 0.97 | 0.95 | 0.92 | 0.86  | 0.98 | 0.96 | 0.89 |
| <i>B119 NSC</i>       | 0.86  | 0.95 | 0.97 | 0.93 | 0.89  | 0.96 | 1    | 0.9  | 0.87  | 0.94 | 0.99 | 0.95 | 0.83  | 0.93 | 0.98 | 0.95 | 0.86  | 0.95 | 0.99 | 0.93 |
| <i>B119 DA2</i>       | 0.8   | 0.86 | 0.89 | 0.96 | 0.82  | 0.86 | 0.9  | 1    | 0.8   | 0.86 | 0.91 | 0.96 | 0.78  | 0.84 | 0.89 | 0.96 | 0.79  | 0.87 | 0.9  | 0.98 |
| <i>I FIBRO</i>        | 0.98  | 0.86 | 0.89 | 0.85 | 0.97  | 0.87 | 0.87 | 0.8  | 1     | 0.86 | 0.87 | 0.86 | 0.98  | 0.85 | 0.87 | 0.85 | 0.98  | 0.86 | 0.87 | 0.82 |
| <i>I3 IPSC</i>        | 0.85  | 0.99 | 0.94 | 0.9  | 0.87  | 0.98 | 0.94 | 0.86 | 0.86  | 1    | 0.95 | 0.92 | 0.83  | 0.98 | 0.94 | 0.91 | 0.85  | 0.98 | 0.95 | 0.89 |
| <i>I3 NSC</i>         | 0.86  | 0.95 | 0.97 | 0.94 | 0.89  | 0.96 | 0.99 | 0.91 | 0.87  | 0.95 | 1    | 0.96 | 0.83  | 0.94 | 0.98 | 0.96 | 0.86  | 0.95 | 0.99 | 0.94 |
| <i>I3 DA2</i>         | 0.86  | 0.92 | 0.94 | 0.98 | 0.87  | 0.92 | 0.95 | 0.96 | 0.86  | 0.92 | 0.96 | 1    | 0.83  | 0.91 | 0.95 | 0.99 | 0.85  | 0.92 | 0.95 | 0.98 |
| <i>P FIBRO</i>        | 0.97  | 0.83 | 0.86 | 0.8  | 0.96  | 0.83 | 0.83 | 0.78 | 0.98  | 0.83 | 0.83 | 0.83 | 1     | 0.82 | 0.83 | 0.81 | 0.96  | 0.84 | 0.84 | 0.8  |
| <i>P1 IPSC</i>        | 0.86  | 0.97 | 0.93 | 0.89 | 0.86  | 0.97 | 0.93 | 0.84 | 0.85  | 0.98 | 0.94 | 0.91 | 0.82  | 1    | 0.95 | 0.91 | 0.84  | 0.96 | 0.94 | 0.87 |
| <i>P1 NSC</i>         | 0.87  | 0.95 | 0.96 | 0.93 | 0.89  | 0.95 | 0.98 | 0.89 | 0.87  | 0.94 | 0.98 | 0.95 | 0.83  | 0.95 | 1    | 0.95 | 0.86  | 0.94 | 0.98 | 0.92 |
| <i>P1 DA2</i>         | 0.85  | 0.92 | 0.94 | 0.97 | 0.86  | 0.92 | 0.95 | 0.96 | 0.85  | 0.91 | 0.96 | 0.99 | 0.81  | 0.91 | 0.95 | 1    | 0.84  | 0.91 | 0.95 | 0.98 |
| <i>S FIBRO</i>        | 0.97  | 0.86 | 0.88 | 0.84 | 0.96  | 0.86 | 0.86 | 0.79 | 0.98  | 0.85 | 0.86 | 0.85 | 0.96  | 0.84 | 0.86 | 0.84 | 1     | 0.85 | 0.86 | 0.82 |
| <i>S110 IPSC</i>      | 0.86  | 0.98 | 0.94 | 0.9  | 0.88  | 0.98 | 0.95 | 0.87 | 0.86  | 0.98 | 0.95 | 0.92 | 0.84  | 0.96 | 0.94 | 0.91 | 0.85  | 1    | 0.96 | 0.9  |
| <i>S110 NSC</i>       | 0.87  | 0.95 | 0.97 | 0.93 | 0.89  | 0.96 | 0.99 | 0.9  | 0.87  | 0.95 | 0.99 | 0.95 | 0.84  | 0.94 | 0.98 | 0.95 | 0.86  | 0.96 | 1    | 0.93 |
| <i>S110 DA2</i>       | 0.82  | 0.89 | 0.92 | 0.97 | 0.84  | 0.89 | 0.93 | 0.98 | 0.82  | 0.89 | 0.94 | 0.98 | 0.8   | 0.87 | 0.92 | 0.98 | 0.82  | 0.9  | 0.93 | 1    |

Supplemental Table 4. Mitochondrial and cell death-related genes.

## Mitochondria genes

|                 |                |                |                |                |                 |                 |                 |
|-----------------|----------------|----------------|----------------|----------------|-----------------|-----------------|-----------------|
| <i>ND1</i>      | <i>NDUFB1</i>  | <i>CO2</i>     | <i>COX7B2</i>  | <i>ATP1B4</i>  | <i>ATP5J</i>    | <i>ATP6V1E1</i> | <i>UQCC</i>     |
| <i>ND2</i>      | <i>NDUFB10</i> | <i>CO3</i>     | <i>COX7C</i>   | <i>ATP2A1</i>  | <i>ATP5J2</i>   | <i>ATP6V1E2</i> | <i>UQCR</i>     |
| <i>ND3</i>      | <i>NDUFB11</i> | <i>COX10</i>   | <i>COX8A</i>   | <i>ATP2A2</i>  | <i>ATP5L</i>    | <i>ATP6V1F</i>  | <i>UQCRB</i>    |
| <i>ND4</i>      | <i>NDUFB2</i>  | <i>COX11</i>   | <i>COX8C</i>   | <i>ATP2A3</i>  | <i>ATP5O</i>    | <i>ATP6V1G1</i> | <i>UQCRC1</i>   |
| <i>ND4L</i>     | <i>NDUFB3</i>  | <i>COX11P</i>  | <i>MT-ATP6</i> | <i>ATP2B1</i>  | <i>ATP5S</i>    | <i>ATP6V1G2</i> | <i>UQCRC2</i>   |
| <i>ND5</i>      | <i>NDUFB4</i>  | <i>COX15</i>   | <i>MT-ATP8</i> | <i>ATP2B2</i>  | <i>ATP5SL</i>   | <i>ATP6V1G3</i> | <i>UQCRCFS1</i> |
| <i>ND6</i>      | <i>NDUFB5</i>  | <i>COX16</i>   | <i>ATP10A</i>  | <i>ATP2B3</i>  | <i>ATP6AP1</i>  | <i>ATP6V1H</i>  | <i>UQCRH</i>    |
| <i>NDUFA1</i>   | <i>NDUFB6</i>  | <i>COX17</i>   | <i>ATP10B</i>  | <i>ATP2B4</i>  | <i>ATP6AP1L</i> | <i>ATP7A</i>    | <i>UQCRHL</i>   |
| <i>NDUFA10</i>  | <i>NDUFB7</i>  | <i>COX18</i>   | <i>ATP10D</i>  | <i>ATP2C1</i>  | <i>ATP6AP2</i>  | <i>ATP7B</i>    | <i>UQCRQ</i>    |
| <i>NDUFA11</i>  | <i>NDUFB8</i>  | <i>COX19</i>   | <i>ATP11A</i>  | <i>ATP2C2</i>  | <i>ATP6V0A1</i> | <i>ATP8A1</i>   | <i>CYC1</i>     |
| <i>NDUFA12</i>  | <i>NDUFB9</i>  | <i>COX41</i>   | <i>ATP11B</i>  | <i>ATP4A</i>   | <i>ATP6V0A2</i> | <i>ATP8A2</i>   | <i>SDHA</i>     |
| <i>NDUFA13</i>  | <i>NDUFC1</i>  | <i>COX412</i>  | <i>ATP11C</i>  | <i>ATP4B</i>   | <i>ATP6V0A4</i> | <i>ATP8B1</i>   | <i>SDHAF1</i>   |
| <i>NDUFA2</i>   | <i>NDUFC2</i>  | <i>COX4NB</i>  | <i>ATP12A</i>  | <i>ATP5A1</i>  | <i>ATP6V0B</i>  | <i>ATP8B2</i>   | <i>SDHAF2</i>   |
| <i>NDUFA3</i>   | <i>NDUFS1</i>  | <i>COX5A</i>   | <i>ATP13A1</i> | <i>ATP5B</i>   | <i>ATP6V0C</i>  | <i>ATP8B3</i>   | <i>SDHALP1</i>  |
| <i>NDUFA4</i>   | <i>NDUFS2</i>  | <i>COX5B</i>   | <i>ATP13A2</i> | <i>ATP5C1</i>  | <i>ATP6V0D1</i> | <i>ATP8B4</i>   | <i>SDHAP2</i>   |
| <i>NDUFA4L2</i> | <i>NDUFS3</i>  | <i>COX6A1</i>  | <i>ATP13A3</i> | <i>ATP5D</i>   | <i>ATP6V0D2</i> | <i>ATP9A</i>    | <i>SDHAP3</i>   |
| <i>NDUFA5</i>   | <i>NDUFS4</i>  | <i>COX6A2</i>  | <i>ATP13A4</i> | <i>ATP5E</i>   | <i>ATP6V0E1</i> | <i>ATP9B</i>    | <i>SDHB</i>     |
| <i>NDUFA6</i>   | <i>NDUFS5</i>  | <i>COX6B1</i>  | <i>ATP13A5</i> | <i>ATP5EP2</i> | <i>ATP6V0E2</i> | <i>ATPAF1</i>   | <i>SDHC</i>     |
| <i>NDUFA7</i>   | <i>NDUFS6</i>  | <i>COX6B2</i>  | <i>ATP1A1</i>  | <i>ATP5F1</i>  | <i>ATP6V1A</i>  | <i>ATPAF2</i>   | <i>SDHD</i>     |
| <i>NDUFA8</i>   | <i>NDUFS7</i>  | <i>COX6BP1</i> | <i>ATP1A2</i>  | <i>ATP5G1</i>  | <i>ATP6V1B1</i> | <i>ATPBD1B</i>  | <i>GSK3A</i>    |
| <i>NDUFA9</i>   | <i>NDUFS8</i>  | <i>COX6C</i>   | <i>ATP1A3</i>  | <i>ATP5G2</i>  | <i>ATP6V1B2</i> | <i>ATPBD3</i>   | <i>GSK3B</i>    |
| <i>NDUFAB1</i>  | <i>NDUFV1</i>  | <i>COX7A1</i>  | <i>ATP1A4</i>  | <i>ATP5G3</i>  | <i>ATP6V1C1</i> | <i>ATPBD4</i>   | <i>UCP1</i>     |
| <i>NDUFAF1</i>  | <i>NDUFV2</i>  | <i>COX7A2</i>  | <i>ATP1B1</i>  | <i>ATP5H</i>   | <i>ATP6V1C2</i> | <i>ATPGD1</i>   | <i>UCP2</i>     |
| <i>NDUFAF2</i>  | <i>NDUFV3</i>  | <i>COX7A2L</i> | <i>ATP1B2</i>  | <i>ATP5I</i>   | <i>ATP6V1D</i>  | <i>ATPIF1</i>   | <i>UCP3</i>     |
| <i>NDUFAF3</i>  | <i>CO1</i>     | <i>COX7B</i>   | <i>ATP1B3</i>  |                |                 |                 |                 |

## Death genes

|                 |                 |                |                 |                     |                  |                     |                     |
|-----------------|-----------------|----------------|-----------------|---------------------|------------------|---------------------|---------------------|
| <i>SLC25A31</i> | <i>BCL7B</i>    | <i>PARK7</i>   | <i>ATP6V0A4</i> | <i>ATG4B</i>        | <i>GCM1</i>      | <i>H2AFX</i>        | <i>SNORD25</i>      |
| <i>SLC25A4</i>  | <i>BCL7C</i>    | <i>PDDC1</i>   | <i>ATP6V0B</i>  | <i>LOC644284</i>    | <i>SNORD48</i>   | <i>LOC729057</i>    | <i>SDK2</i>         |
| <i>SLC25A5</i>  | <i>BCL8</i>     | <i>PACRG</i>   | <i>ATP6V0C</i>  | <i>NAMPT</i>        | <i>LOC650034</i> | <i>RPL12P6</i>      | <i>STT3B</i>        |
| <i>SLC25A6</i>  | <i>BCL9</i>     | <i>PACRGL</i>  | <i>ATP6V0D1</i> | <i>LOC654201</i>    | <i>RNU1F1</i>    | <i>LOC728787</i>    | <i>SRCAP</i>        |
| <i>PPID</i>     | <i>BCL9L</i>    | <i>PINK1</i>   | <i>ATP6V0D2</i> | <i>LOC649841</i>    | <i>ISLR2</i>     | <i>LOC645195</i>    | <i>LOC100129685</i> |
| <i>VCY1B</i>    | <i>BCLAF1</i>   | <i>SNCA</i>    | <i>ATP6V0E1</i> | <i>LOC653383</i>    | <i>CDK5R2</i>    | <i>TBX19</i>        | <i>SUV420H1</i>     |
| <i>VDAC1</i>    | <i>HRK</i>      | <i>SNCAIP</i>  | <i>ATP6V0E2</i> | <i>OXT</i>          | <i>RN7SK</i>     | <i>LOC729926</i>    | <i>NSUN5B</i>       |
| <i>VDAC2</i>    | <i>BID</i>      | <i>SNCB</i>    | <i>ATP6V1A</i>  | <i>SNORD95</i>      | <i>GNAQ</i>      | <i>SNORA80</i>      | <i>NGFR</i>         |
| <i>VDAC3</i>    | <i>BAD</i>      | <i>SNCG</i>    | <i>ATP6V1B1</i> | <i>RNU1G2</i>       | <i>CACYBP</i>    | <i>RAB11B</i>       | <i>DPF1</i>         |
| <i>AVEN</i>     | <i>BAG1</i>     | <i>LRRK2</i>   | <i>ATP6V1B2</i> | <i>RNU1-3</i>       | <i>RNU4-2</i>    | <i>HS.545589</i>    | <i>SCAND1</i>       |
| <i>CARD10</i>   | <i>BAG2</i>     | <i>UCHL1</i>   | <i>ATP6V1C1</i> | <i>RNU1-5</i>       | <i>INPP5D</i>    | <i>IL12A</i>        | <i>RNU6-1</i>       |
| <i>CARD11</i>   | <i>BAG3</i>     | <i>NR4A2</i>   | <i>ATP6V1C2</i> | <i>LOC100130562</i> | <i>LOC642255</i> | <i>SNORD12C</i>     | <i>LOC440258</i>    |
| <i>CARD14</i>   | <i>BAG4</i>     | <i>ATP13A2</i> | <i>ATP6V1D</i>  | <i>HS.537779</i>    | <i>HS.582113</i> | <i>LOC642661</i>    | <i>LOC100134364</i> |
| <i>CARD16</i>   | <i>BAG5</i>     | <i>AMBRA1</i>  | <i>ATP6V1E1</i> | <i>DKFZP547K054</i> | <i>FOXS1</i>     | <i>LOC100134468</i> | <i>TBX2</i>         |
| <i>CARD17</i>   | <i>TFAM</i>     | <i>BECN1</i>   | <i>ATP6V1E2</i> | <i>KSR1</i>         | <i>RN5S9</i>     | <i>OSAP</i>         | <i>PRKAR1B</i>      |
| <i>CARD18</i>   | <i>TFAMP1</i>   | <i>BECN1L1</i> | <i>ATP6V1F</i>  | <i>LOC442041</i>    | <i>ELAVL2</i>    | <i>FSD1L</i>        | <i>SESN3</i>        |
| <i>CARD6</i>    | <i>PPARG</i>    | <i>BLOC1S1</i> | <i>ATP6V1G1</i> | <i>PSMC4</i>        | <i>DRD3</i>      | <i>GADD45A</i>      | <i>POGZ</i>         |
| <i>CARD8</i>    | <i>PPARGC1A</i> | <i>BLOC1S2</i> | <i>ATP6V1G2</i> | <i>LOC139116</i>    | <i>WASH3P</i>    | <i>CDKN1A</i>       | <i>RNU6-15</i>      |
| <i>CARD9</i>    | <i>PPARGC1B</i> | <i>BLOC1S3</i> | <i>ATP6V1G3</i> | <i>CNTD2</i>        | <i>FADS2</i>     | <i>SNORD13</i>      | <i>NOVA2</i>        |
| <i>CASKIN2</i>  | <i>POLRMT</i>   | <i>LAMP1</i>   | <i>ATP6V1H</i>  | <i>HS.564389</i>    | <i>PPDPF</i>     | <i>HS.562219</i>    | <i>LOC389672</i>    |
| <i>CASP1</i>    | <i>MTERF</i>    | <i>LAMP2</i>   | <i>MMP1</i>     | <i>LOC399942</i>    | <i>LSM11</i>     | <i>C7ORF20</i>      | <i>LOC642962</i>    |
| <i>CASP10</i>   | <i>MTERFD1</i>  | <i>LAMP3</i>   | <i>MMP10</i>    | <i>SNORA84</i>      | <i>C17ORF89</i>  | <i>HS.133410</i>    | <i>BLOC1S2</i>      |
| <i>CASP12</i>   | <i>MTERFD2</i>  | <i>LAPTM4A</i> | <i>MMP11</i>    | <i>LOC641901</i>    | <i>CDC2L1</i>    | <i>SFXN1</i>        | <i>RBM18</i>        |
| <i>CASP14</i>   | <i>MTERFD3</i>  | <i>LAPTM4B</i> | <i>MMP12</i>    | <i>SNORA28</i>      | <i>LOC646330</i> | <i>LGALS3</i>       | <i>CDC42EP1</i>     |
| <i>CASP2</i>    | <i>GABPAP</i>   | <i>LAPTM5</i>  | <i>MMP13</i>    | <i>LOC730167</i>    | <i>ALOX5AP</i>   | <i>SLC25A36</i>     | <i>GUCY1A2</i>      |
| <i>CASP3</i>    | <i>GABPB1</i>   | <i>LYST</i>    | <i>MMP14</i>    | <i>RNU1A3</i>       | <i>SNORD3D</i>   | <i>FOSB</i>         | <i>ZBTB11</i>       |
| <i>CASP4</i>    | <i>GABPB2</i>   | <i>NPC1</i>    | <i>MMP15</i>    | <i>LOC100132564</i> | <i>LOC652255</i> | <i>LOC158301</i>    | <i>HIP1R</i>        |
| <i>CASP5</i>    | <i>KEAP1</i>    | <i>NPC1L1</i>  | <i>MMP16</i>    | <i>LOC100132394</i> | <i>HRK</i>       | <i>PI4KA</i>        | <i>RPPH1</i>        |



|           |         |          |              |              |              |              |              |
|-----------|---------|----------|--------------|--------------|--------------|--------------|--------------|
| CASP6     | NFE2    | NPC2     | MMP17        | LOC652826    | KCNJ4        | HMOX1        | LOC347544    |
| CASP7     | NFE2L1  | EPM2A    | MMP19        | LOC389049    | LOC440311    | FLCN         | TMEM88       |
| CASP8     | NFE2L2  | EPM2AIP1 | MMP2         | LOC441193    | LOC653156    | LOC730995    | LOC100008588 |
| CASP8AP2  | NFE2L3  | ATG10    | MMP20        | C1QTNF4      | ISG20        | CCRN4L       | CDC34        |
| CASP9     | ATF1    | ATG12    | MMP21        | RRAD         | LOC643446    | FAM46C       | LOC100130276 |
| LOC650759 | ATF2    | ATG16L1  | MMP23A       | LOC100131017 | LOC728188    | EPHA2        | SNORD36A     |
| MCL1      | ATF3    | ATG16L2  | MMP23B       | HIST1H2BJ    | HERC5        | CTSD         | TCEB3        |
| BCL10     | ATF4    | ATG2A    | MMP24        | LHX5         | TNKS         | LOC648931    | C1ORF70      |
| BCL11A    | ATF5    | ATG2B    | MMP25        | LOC100131323 | PER1         | LOC100130835 | IER5L        |
| BCL11B    | ATF6    | ATG3     | MMP26        | FAM108A3     | UBTD1        | PSMA7        | WWP2         |
| BCL2      | ATF6B   | ATG4A    | MMP27        | SPTBN1       | PLK3         | HIST3H2BB    | RNU6ATAC     |
| BCL2A1    | ATF7    | ATG4B    | MMP28        | TNFRSF12A    | HSPBP1       | RALGAPB      | ITGA5        |
| BCL2L1    | ATF7IP  | ATG4C    | MMP3         | GABPB1       | RBM38        | SH2B2        | LOC727980    |
| BCL2L10   | ATF7IP2 | ATG4D    | MMP7         | RNU11        | SIRT7        | HIST1H4E     | NFKBIL1      |
| BCL2L11   | SIRT3   | ATG5     | MMP8         | RELA         | RAB30        | LOC100134424 | RARA         |
| BCL2L12   | PRKAA1  | ATG7     | MMP9         | SNORD55      | SDC4         | UNCX         | HSPA1B       |
| BCL2L13   | PRKAA2  | ATG9A    | MMPL1        | LOC651149    | RNU4ATAC     | AKT1S1       | SPIN1        |
| BCL2L14   | GCN1L1  | ATG9B    | LRRC4B       | VTRNA1-2     | PI4KAP1      | TNRC4        | C6ORF221     |
| BCL2L15   | MTFR1   | NEU1     | SDR39U1      | DLG4         | LOC345630    | NSUN5C       | ZNF787       |
| BCL2L2    | MFN1    | SMPD1    | BRAF         | HSPA7        | WASH5P       | ZNF570       | NOC2L        |
| BCL3      | MFN2    | ATP6AP1  | LOC100008589 | SNORD3A      | PMAIP1       | NPAS4        | NUCKS1       |
| BCL6      | OPA1    | ATP6AP1L | LOC100133719 | DCC          | TRAF4        | NACC2        | BTG3         |
| BCL6B     | CRLS1   | ATP6AP2  | GIT2         | KDM6B        | CRYAB        | CSNK2A1P     | TCEA1        |
| BCL7A     | CRMP1   | ATP6V0A1 | SNORA63      | RRN3P2       | LOC100133950 | RHOF         | LOC346950    |
|           | PARK2   | ATP6V0A2 |              |              |              |              |              |

Supplemental Table 5. Differential expression of mitochondria related genes in dopaminergic neurons derived from WT and *PARK2*<sup>-/-</sup> transgenic iPSC lines.

| SYMBOL           | <i>PARK2</i> <sup>-/-</sup> DA2 | <i>PARK2</i> <sup>-/+</sup> DA2 | WT DA2 | <i>PARK2</i> <sup>-/-</sup> / WT DA2<br>Fold increase |
|------------------|---------------------------------|---------------------------------|--------|-------------------------------------------------------|
| <b>NR4A2</b>     | 984                             | 205                             | 172    | 5.71                                                  |
| <b>NPAS4</b>     | 202                             | 217                             | 39     | 5.24                                                  |
| <b>COX11P</b>    | 52                              | 59                              | 11     | 4.95                                                  |
| <b>C1QTNF4</b>   | 941                             | 2267                            | 218    | 4.31                                                  |
| <b>NOVA2</b>     | 550                             | 858                             | 135    | 4.09                                                  |
| <b>ATF7IP</b>    | 72                              | 33                              | 20     | 3.67                                                  |
| <b>DPF1</b>      | 2744                            | 4382                            | 874    | 3.14                                                  |
| <b>LOC441193</b> | 42                              | 13                              | 14     | 2.95                                                  |
| <b>TFAMP1</b>    | 61                              | 41                              | 21     | 2.91                                                  |
| <b>UCP3</b>      | 94                              | 67                              | 36     | 2.62                                                  |
| <b>LSM11</b>     | 189                             | 460                             | 73     | 2.58                                                  |
| <b>RARA</b>      | 2218                            | 1459                            | 884    | 2.51                                                  |
| <b>CDK5R2</b>    | 455                             | 1023                            | 189    | 2.40                                                  |
| <b>PDDC1</b>     | 731                             | 784                             | 308    | 2.37                                                  |
| <b>NDUFB1</b>    | 224                             | 331                             | 97     | 2.31                                                  |
| <b>SNCB</b>      | 103                             | 517                             | 45     | 2.30                                                  |
| <b>BLOC1S1</b>   | 2388                            | 1824                            | 1043   | 2.29                                                  |

|                |       |       |      |      |
|----------------|-------|-------|------|------|
| <b>SCAND1</b>  | 6180  | 6422  | 2713 | 2.28 |
| <b>ISLR2</b>   | 6080  | 1450  | 2742 | 2.22 |
| <b>WASH5P</b>  | 305   | 363   | 139  | 2.20 |
| <b>ATP5D</b>   | 9074  | 10479 | 4175 | 2.17 |
| <b>ATG16L2</b> | 151   | 121   | 70   | 2.17 |
| <b>BCL11B</b>  | 2704  | 5161  | 1271 | 2.13 |
| <b>PRKAR1B</b> | 442   | 524   | 209  | 2.12 |
| <b>NDUFB7</b>  | 12786 | 10745 | 6145 | 2.08 |

| <b>SYMBOL</b>    | <b>PARK2<sup>-/-</sup> DA2</b> | <b>PARK2<sup>+/-</sup> DA2</b> | <b>WT DA2</b> | <b>PARK2<sup>-/-</sup> / WT DA2<br/>Fold decrease</b> |
|------------------|--------------------------------|--------------------------------|---------------|-------------------------------------------------------|
| <b>CDKN1A</b>    | 3956                           | 4111                           | 11598         | 0.34                                                  |
| <b>ATF5</b>      | 766                            | 1037                           | 3556          | 0.22                                                  |
| <b>NEU1</b>      | 779                            | 959                            | 2399          | 0.32                                                  |
| <b>CRYAB</b>     | 192                            | 65                             | 2005          | 0.10                                                  |
| <b>ITGA5</b>     | 185                            | 247                            | 1931          | 0.10                                                  |
| <b>LAMP3</b>     | 175                            | 156                            | 1559          | 0.11                                                  |
| <b>HERC5</b>     | 232                            | 228                            | 1262          | 0.18                                                  |
| <b>TNFRSF12A</b> | 345                            | 116                            | 1201          | 0.29                                                  |
| <b>CARD10</b>    | 249                            | 372                            | 987           | 0.25                                                  |
| <b>ATF3</b>      | 91                             | 190                            | 893           | 0.10                                                  |
| <b>EPHA2</b>     | 146                            | 116                            | 818           | 0.18                                                  |
| <b>ISG20</b>     | 154                            | 143                            | 520           | 0.30                                                  |
| <b>HMOX1</b>     | 72                             | 177                            | 417           | 0.17                                                  |
| <b>ATP10B</b>    | 89                             | 480                            | 362           | 0.25                                                  |
| <b>PMAIP1</b>    | 44                             | 8                              | 350           | 0.13                                                  |
| <b>VTRNA1-2</b>  | 38                             | 19                             | 299           | 0.13                                                  |
| <b>SNORA63</b>   | 45                             | 76                             | 186           | 0.24                                                  |
| <b>NAMPT</b>     | 25                             | 37                             | 183           | 0.13                                                  |
| <b>MMP10</b>     | 18                             | 29                             | 151           | 0.12                                                  |
| <b>IL12A</b>     | 13                             | 106                            | 62            | 0.21                                                  |

Supplemental Table 6. Differential expression of mitochondria related genes in *PARK2* KO neuron samples.

| <b>SYMBOL</b> | <b>PARK2<sup>-/-</sup></b> | <b>PARK2<sup>+/-</sup></b> | <b>WT</b> | <b>PARK2<sup>-/-</sup> / WT Fold increase</b> |
|---------------|----------------------------|----------------------------|-----------|-----------------------------------------------|
| <b>NR4A2</b>  | 441                        | 117                        | 30        | 14.61                                         |

|                     |       |       |       |       |
|---------------------|-------|-------|-------|-------|
| <b>GNAQ</b>         | 352   | 124   | 26    | 13.44 |
| <b>LOC100131323</b> | 253   | 90    | 22    | 11.35 |
| <b>LOC399942</b>    | 1513  | 465   | 145   | 10.40 |
| <b>CACYBP</b>       | 494   | 197   | 52    | 9.49  |
| <b>LOC728188</b>    | 567   | 229   | 66    | 8.63  |
| <b>ATP5E</b>        | 8745  | 4462  | 1047  | 8.35  |
| <b>RPL12P6</b>      | 1988  | 1096  | 259   | 7.66  |
| <b>LOC346950</b>    | 809   | 507   | 111   | 7.28  |
| <b>UQCRH</b>        | 13944 | 9048  | 2060  | 6.77  |
| <b>BLOC1S2</b>      | 200   | 103   | 30    | 6.75  |
| <b>BLOC1S2</b>      | 200   | 103   | 30    | 6.75  |
| <b>LOC100130562</b> | 2758  | 1548  | 438   | 6.29  |
| <b>LOC653156</b>    | 10483 | 10347 | 1952  | 5.37  |
| <b>LOC100129685</b> | 8345  | 8142  | 1639  | 5.09  |
| <b>ATP7A</b>        | 93    | 50    | 19    | 4.97  |
| <b>COX17</b>        | 8464  | 4974  | 1772  | 4.78  |
| <b>COX6B1</b>       | 17121 | 9309  | 3851  | 4.45  |
| <b>NDUFA12</b>      | 13530 | 9681  | 3243  | 4.17  |
| <b>PSMC4</b>        | 863   | 287   | 207   | 4.16  |
| <b>STT3B</b>        | 103   | 77    | 25    | 4.09  |
| <b>NFE2L2</b>       | 500   | 292   | 123   | 4.07  |
| <b>NDUFB6</b>       | 5219  | 3280  | 1334  | 3.91  |
| <b>PPID</b>         | 90    | 70    | 26    | 3.49  |
| <b>SNCA</b>         | 776   | 249   | 225   | 3.45  |
| <b>LOC347544</b>    | 16556 | 8657  | 4840  | 3.42  |
| <b>LOC730167</b>    | 631   | 445   | 185   | 3.41  |
| <b>LOC652826</b>    | 380   | 165   | 115   | 3.30  |
| <b>COX7B</b>        | 6393  | 2713  | 1953  | 3.27  |
| <b>PPARGC1A</b>     | 393   | 193   | 123   | 3.20  |
| <b>ELAVL2</b>       | 404   | 198   | 130   | 3.10  |
| <b>LOC651149</b>    | 4251  | 2128  | 1371  | 3.10  |
| <b>ATF2</b>         | 318   | 268   | 104   | 3.06  |
| <b>ATP1B1</b>       | 2984  | 2193  | 1027  | 2.90  |
| <b>SNORD36A</b>     | 218   | 97    | 76    | 2.87  |
| <b>UQCRB</b>        | 1408  | 945   | 493   | 2.86  |
| <b>BCL11B</b>       | 726   | 508   | 256   | 2.84  |
| <b>ATP5EP2</b>      | 40591 | 30696 | 14508 | 2.80  |
| <b>HRK</b>          | 158   | 60    | 58    | 2.75  |
| <b>ATP5C1</b>       | 6577  | 4742  | 2404  | 2.74  |
| <b>ATG4C</b>        | 124   | 156   | 46    | 2.72  |
| <b>SNORD55</b>      | 106   | 73    | 40    | 2.64  |
| <b>NAMPT</b>        | 96    | 41    | 37    | 2.63  |
| <b>SLC25A36</b>     | 369   | 205   | 146   | 2.53  |

| <i>COX5B</i>        | 19434                       | 12240                       | 7708  | 2.52                                           |
|---------------------|-----------------------------|-----------------------------|-------|------------------------------------------------|
| SYMBOL              | <i>PARK2</i> <sup>-/-</sup> | <i>PARK2</i> <sup>-/+</sup> | WT    | <i>PARK2</i> <sup>-/-</sup> / WT Fold decrease |
| <i>DPF1</i>         | 426                         | 403                         | 1058  | 0.40                                           |
| <i>SNORD3A</i>      | 262                         | 336                         | 659   | 0.40                                           |
| <i>ATP9B</i>        | 45                          | 115                         | 113   | 0.40                                           |
| <i>LOC100131017</i> | 37                          | 39                          | 94    | 0.40                                           |
| <i>NSUN5B</i>       | 58                          | 46                          | 149   | 0.39                                           |
| <i>NDUFV1</i>       | 1992                        | 1598                        | 5080  | 0.39                                           |
| <i>CDC34</i>        | 704                         | 627                         | 1801  | 0.39                                           |
| <i>ATG9A</i>        | 211                         | 265                         | 542   | 0.39                                           |
| <i>UQCRC1</i>       | 2805                        | 3803                        | 7240  | 0.39                                           |
| <i>SH2B2</i>        | 170                         | 123                         | 438   | 0.39                                           |
| <i>LOC100130276</i> | 120                         | 215                         | 312   | 0.38                                           |
| <i>LOC642661</i>    | 35                          | 37                          | 92    | 0.38                                           |
| <i>LOC100134424</i> | 97                          | 75                          | 254   | 0.38                                           |
| <i>LOC642255</i>    | 43                          | 33                          | 118   | 0.37                                           |
| <i>GSK3B</i>        | 737                         | 1189                        | 2026  | 0.36                                           |
| <i>LOC100134364</i> | 2330                        | 2757                        | 6409  | 0.36                                           |
| <i>UBTD1</i>        | 120                         | 155                         | 337   | 0.36                                           |
| <i>SDHA</i>         | 440                         | 681                         | 1245  | 0.35                                           |
| <i>ATP13A2</i>      | 190                         | 274                         | 546   | 0.35                                           |
| <i>ATP13A2</i>      | 190                         | 274                         | 546   | 0.35                                           |
| <i>PI4KAP1</i>      | 84                          | 67                          | 246   | 0.34                                           |
| <i>DKFZp547K054</i> | 24                          | 46                          | 74    | 0.32                                           |
| <i>IER5L</i>        | 151                         | 145                         | 467   | 0.32                                           |
| <i>COX19</i>        | 302                         | 444                         | 947   | 0.32                                           |
| <i>LOC100132564</i> | 197                         | 297                         | 626   | 0.31                                           |
| <i>C1QTNF4</i>      | 138                         | 130                         | 443   | 0.31                                           |
| <i>LRRC4B</i>       | 71                          | 52                          | 227   | 0.31                                           |
| <i>WASH3P</i>       | 32                          | 33                          | 103   | 0.31                                           |
| <i>NACC2</i>        | 39                          | 91                          | 127   | 0.31                                           |
| <i>HIP1R</i>        | 29                          | 9                           | 98    | 0.30                                           |
| <i>LOC389049</i>    | 68                          | 100                         | 236   | 0.29                                           |
| <i>ATP13A1</i>      | 304                         | 498                         | 1071  | 0.28                                           |
| <i>LOC729057</i>    | 37                          | 36                          | 138   | 0.27                                           |
| <i>LOC100008588</i> | 2328                        | 2449                        | 8759  | 0.27                                           |
| <i>WASH5P</i>       | 57                          | 66                          | 216   | 0.26                                           |
| <i>LOC100132394</i> | 3932                        | 4986                        | 15396 | 0.26                                           |
| <i>RNU4-2</i>       | 250                         | 312                         | 1004  | 0.25                                           |
| <i>MMP15</i>        | 178                         | 247                         | 736   | 0.24                                           |
| <i>NOVA2</i>        | 63                          | 54                          | 264   | 0.24                                           |

---

|                  |     |     |      |      |
|------------------|-----|-----|------|------|
| <b>LOC644284</b> | 33  | 54  | 142  | 0.23 |
| <b>UCP2</b>      | 69  | 153 | 296  | 0.23 |
| <b>ATG4D</b>     | 78  | 122 | 337  | 0.23 |
| <b>POLRMT</b>    | 289 | 520 | 1362 | 0.21 |
| <b>MMP23B</b>    | 18  | 18  | 84   | 0.21 |
| <b>ISLR2</b>     | 371 | 133 | 1812 | 0.20 |
| <b>ITGA5</b>     | 32  | 136 | 158  | 0.20 |
| <b>ATPBD3</b>    | 17  | 60  | 97   | 0.17 |
| <b>RNU4ATAC</b>  | 165 | 221 | 1018 | 0.16 |
| <b>LOC441193</b> | 13  | 53  | 81   | 0.16 |

---

## **Experimental procedures**

### **Generation of iPSC lines from PD patients and controls**

Fibroblasts were grown in Minimum Essential Medium Alpha, supplemented with 10-15% (line-specific) fetal bovine serum (FBS), and 1% antibiotic/antimycotic (all from Life Tech., NJ) under 3% O<sub>2</sub>, 5% CO<sub>2</sub>, 37°C in humidified chamber, and passaged every 5-6 days using TrypLE™ (Life Tech., NJ).

Reprogramming using Sendai virus (SeV, CytoTune™ SeV kit, Life Tech., NJ) was carried out following manufacturer's recommendations and previously described (Sivapatham and Zeng, 2014).

For spontaneous in vitro differentiation, iPSC were detached using collagenase. Cells were cultured in a suspension in ultra-low-attachment plates containing the EB differentiation medium (DMEM/F12 supplemented with StemPro supplement, BSA and FGF2). After 8 days in suspension culture, the EB were transferred to a gelatin-coated plate and cultured in the same medium for another 14 days prior to immunostaining.

### **Generation of *PARK2* KO isogenic lines by ZFN**

ZFN expression plasmids targeting exon1 of *PARK2* gene were purchased from Sigma. Each ZFN polypeptide consists of two functional domains: the DNA binding domain (the recognition sequences of each ZFN are underlined) and the cleavage domain (FokI nuclease). After nucleofection of the *PARK2* ZFN pair in NCRM1, clones expanded from single cells in a 96-well plate were analyzed by DNA sequencing at the junction followed by sequence confirmation and verification of heterozygotes or homozygotes. Several clones with frame shift mutations close to exon 1 were expanded. A heterozygote of *PARK2* (*PARK2*<sup>+/-</sup>) and a homozygote of *PARK2* (*PARK2*<sup>-/-</sup>) was chosen for further analysis, and the mutations details along with the wild type (WT) sequences were shown in Fig. 5B.

### **MTT Assay**

Cell viability was measured using an MTT assay, as previously described. (Peng et al., 2013). Briefly, cells grown in 48-well plates were maintained as required. Five mg/mL MTT tetrazolium salt was

added to each well, and incubated for 4 h at 37 °C. Crystals resulting from mitochondrial enzymatic activity on MTT substrate were solubilized with DMSO in 37 °C for 5 min. Absorbance was measured at 590 nm using a microplate reader (Molecular Devices, Sunnyvale, CA). Cell survival was measured in absorbance difference between treated and untreated cells.

### **Antibodies**

The following primary antibodies were used: NESTIN (611658, BD Transduction laboratories, 1:500), TUJ-1 (clone SDL.3D10, T8660, Sigma, 1:1000), GFAP (Z0334, DakoCytomation, 1:2000), TH (P40101, Pel-Freez, 1:500), TH (Mouse, 22941, ImmunoStar, 1:500), NANOG (14-5768-82, eBioscience, 1:100), SOX2 (Ab1125, Abcam, 1:1000), FOXA2 (Ab40874, Abcam, 1:1000), SMA (A2547, Sigma, 1:500), AFP (A8452, Sigma, 1:500), TRA 1-60 (14-8863-82, eBioscience, 1:60), OCT4 (ab19857, Abcam, 1:1250), SOX2 (MAB4343, Millipore, 1:250), and Alkaline phosphatase staining kit II purchased from Stemgent.

### **Confocal microscopic stereology of mitochondria volume fraction**

Control and patient-derived neuron precursors (at day 14 of differentiation) were cultured in 24 or 96 well cover glass-bottomed microplates. Cells were differentiated for another 14 days in PA6-CM in presence of BDNF and GDNF as described previously. On day 28, cultures were loaded with MitoTracker Red CMXRos (75 nM), calcein-AM (1 $\mu$ M) and Hoechst 33342 (5 $\mu$ g/ml) for 30 min and imaged on a Zeiss LSM 780 laser scanning confocal microscope in differentiation medium at 37°C and 5% CO<sub>2</sub>. Using a Plan-Apochromat 63 $\times$ /1.4 oil lens 1024 $\times$ 1024 pixel single planes were recorded at 44 nm pixel size at 1 Airy unit pinhole at recommended spectral settings. Using the Multi Time Series PLUS module of the ZEN 2011 software (Carl Zeiss, Jena, Germany) and Definite Focus autofocus, first live cell images were acquired automatically along a 10 $\times$ 10 grid while systematically cycling z-focus. After fixation and labeling immunofluorescence of Alexa488-labeled TUJ-1 and Alexa647-labeled TH were recorded using stored coordinates and the Hoechst nuclear staining to register images with the live cell micrographs. Recordings were analyzed in Image Analyst MKII (Image Analyst Software, CA). The volume fraction was

calculated using image binarization and summing the number of pixels in all planes corresponding to mitochondrial and cellular profiles. Their ratio multiplied by the stereological correction factor of 2/3 considering projection of mitochondria into the optical thickness of the imaged plane provided the volume fraction (Gerencser et al., 2012). To gate the detection to dopaminergic neurons, regions of binarized images corresponding to the TH staining were manually outlined and the total numbers of pixels corresponding to mitochondrial and cellular profiles were obtained within these shapes. Importantly, a bias in  $V_f$  because of altered mitochondrial membrane potential is unlikely. Firstly, fluorescence of MitoTracker Red CMXRos is only partially potential-sensitive (because of lipid partitioning and self-quenching) and it has been shown to stain mitochondria with deficient respiration (Kukat et al., 2008; Minamikawa et al., 1999). Secondly, the image processing pipeline performing binarization of MitoTracker images was designed to be little affected by variations in staining intensity (Gerencser et al., 2012).

### **Electron microscopy**

Cells grown on a Thermanox (Nalgene Nunc International) coverslip were fixed for 30 min in 2% (w/v) paraformaldehyde and 2.5% (w/v) glutaraldehyde in 0.1 M sodium cacodylate. Cells were post-fixed in 1% (w/v) osmium tetroxide and 0.8% (w/v) potassium ferrocyanide in 0.1 M sodium cacodylate for 60 min, then stained with 2% (w/v) uranyl acetate for 30 min. Dehydrated and EMBED-812 infiltrated samples were embedded in EMBED-filled BEEM (Electron Microscopy Sciences, Hatfield, PA, USA) capsules at 60°C for 72 h. Using an MT-7000 ultramicrotome, 70 nm-thick sections were generated and imaged on a Phillips Technai 12 transmission electron microscope at 80 kV at 68,000x.

### **Immunocytochemistry**

The quantification of immunoreactive cells in culture was performed by analyzing fluorescent images using Adobe Photoshop. Cell counts were expressed as a percentage of total cells in a field. Total



number of cells was represented by the number of Hoechst-labeled nuclei on each image. Four different randomly chosen fields from four independent experiments were counted by three different individuals. Values were obtained by evaluating at least 600-750 TH-positive cells per experiment. Statistical analysis was performed using the Student's t-test with two-tailed distribution and assuming equal variance.

### **Whole genome expression analysis**

The background method was used for normalization. The maximum expression value of gene for probe set was used as the expression value of the gene. For the processed data, the dendrogram was represented by global array clustering of genes across all the experimental samples using the complete linkage method and measuring the Euclidian distance. Expression of sample correlations was a measure of Pearson's coefficient, implemented in R System.

### **qPCR analysis**

Quantitative PCR reactions were carried out on the CFX96<sup>TM</sup> Touch Bio-Rad instrument (Bio-Rad, CA) using iTaq<sup>TM</sup> Universal SYBR<sup>®</sup> Green supermix (Bio-Rad, CA) according to the manufacturers' instructions. PCR reactions were conducted in duplicate or triplicate for each sample. Genomic DNA contamination and RNA quality were assayed using PrimePCR<sup>TM</sup> control assays (Bio-Rad, CA). For microarray validation experiments samples included Y9 (control), A6, A23 (*SNCA* triplication), I3, P1, B119, S110 (*PARK2* mutants), K20, K25 (*LRRK2* mutants), and T101 (*GBA* mutant) at dopaminergic stage (28 days of differentiation). Human *TBP*, *GAPDH*, and *ACTB* were amplified as internal standards. Reported values were calculated using  $\Delta\Delta C_t$  method and normalized against endogenous *ACTB* (pluripotency and SeV genes) or *TBP* and *GAPDH* (NSC and DA gene expression). Primer sequences were previously described (Sivapatham and Zeng, 2014).

### **Western blot analysis**

Following SDS-polyacrylamide gel electrophoretic separation, proteins were transferred to 0.22 mm PVDF membrane (Bio-Rad, CA). Blocking was done in TBS with 5% milk and 0.1% Tween (all from Bio-

Rad, CA) for 1 hour at room temperature. Membranes were incubated with the following antibodies at 4°C overnight:  $\alpha$ -synuclein (BD Biosciences, 1:750), TH (Pel-Freeze, 1:1500), TH (Sigma, 1:1500), Horseradish peroxidase conjugated secondary antibodies (Life Tech., NJ) were diluted in blocking buffer and incubated for 1 hour at room temperature. Detection of bound antibodies was performed using ECL Advance Western Blotting Detection kit (Amersham Biosciences, NJ) and chemiluminescent signal was recorded on Hyperfilm (Amersham Biosciences, NJ).

## References

- Gerencser, A.A., Chinopoulos, C., Birket, M.J., Jastroch, M., Vitelli, C., Nicholls, D.G., and Brand, M.D. (2012). Quantitative measurement of mitochondrial membrane potential in cultured cells: calcium-induced de- and hyperpolarization of neuronal mitochondria. *The Journal of physiology* *590*, 2845-2871.
- Peng, J., Liu, Q., Rao, M.S., and Zeng, X. (2013). Using human pluripotent stem cell-derived dopaminergic neurons to evaluate candidate Parkinson's disease therapeutic agents in MPP+ and rotenone models. *Journal of biomolecular screening* *18*, 522-533.
- Sivapatham, R., and Zeng, X. (2014). Generation and Characterization of Patient-Specific Induced Pluripotent Stem Cell for Disease Modeling. *Methods in molecular biology*.
